# Supplementary material for: Human Sterols Are Overproduced, Stored and Excreted in Yeasts
Source: MDPI journal article supplement (doi:10.3390/ijms25020781), 2024-01-08
Supplement: s1 [file s1]

## Supplementary Figures and Tables

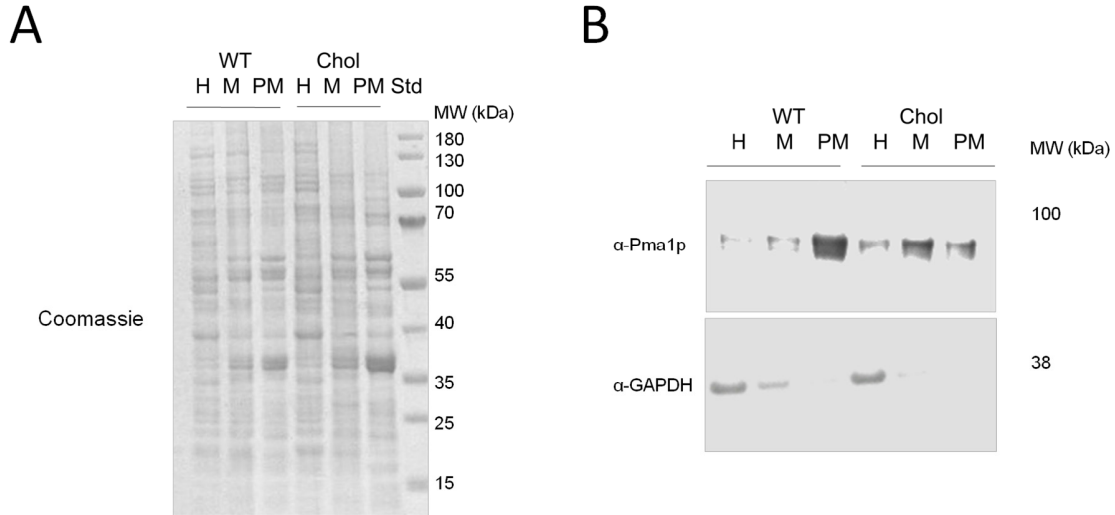

**Figure S1: Immunoblot analysis of *K. phaffii* plasma membrane fractions.** (A) The *K. phaffii* wild type and cholesterol strains were cultivated to middle exponential phase, harvested, disrupted and fractionated applying a density gradient centrifugation as described in Materials and Methods. Protein patterns of the homogenate (H), a mitochondria-enriched fraction (M) collected after the first density gradient centrifugation at the interphase 43% sucrose and TE-buffer, and purified plasma membrane fraction (PM) are shown. Molecular mass standards are indicated in the lane on the right (kDa). Lanes were loaded with 15 µg of total protein, each. Proteins were stained with Coomassie blue. (B) Quality control of the fractions was done by immunoblot analysis. Antisera were directed against plasma membrane H<sup>+</sup>-ATPase Pma1p, and cytosolic glyceraldehyde-3-phosphate-dehydrogenase GAPDH (Grillitsch et al., 2014).

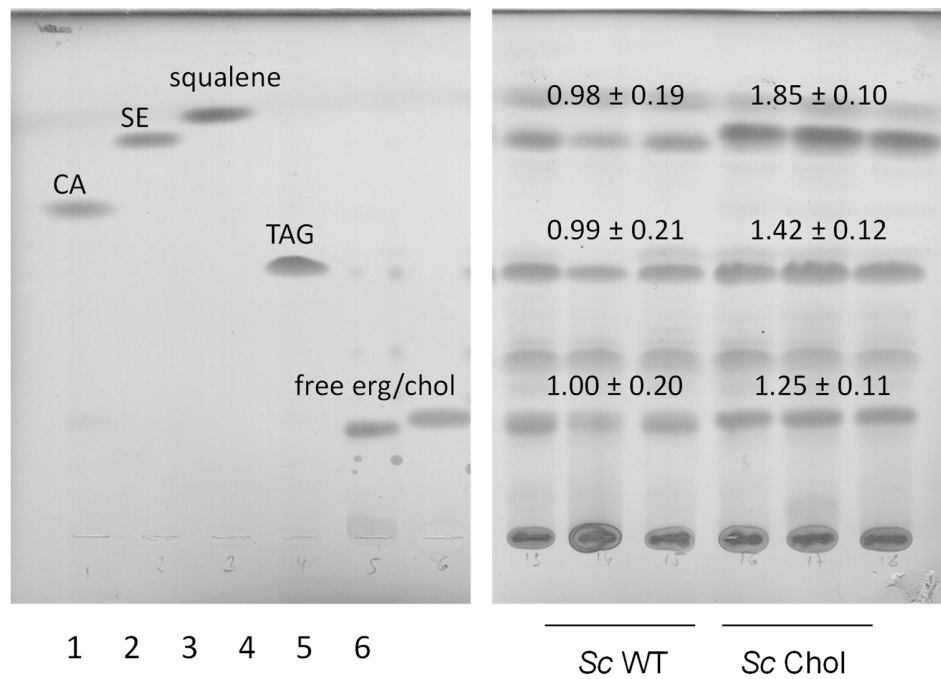

**Figure S2: TLC analysis of wild type and cholesterol producing *S. cerevisiae* strains.** The *S. cerevisiae* wild type and cholesterol strains were cultivated at 28°C for 24 h until they reached early exponential phase, harvested by centrifugation and analyzed by thin layer chromatography. Applied standards were 6 µg of (1) cholesteryl acetate (CA), (2) cholesteryl oleate/sterol ester (SE), (3) squalene, (4) triolein (TAG), (5) free ergosterol, and (6) free cholesterol. Band intensities obtained on TLCs were quantified using Fiji [1] and signal quantifications are presented as mean +/- standard deviations from three biological replicates.

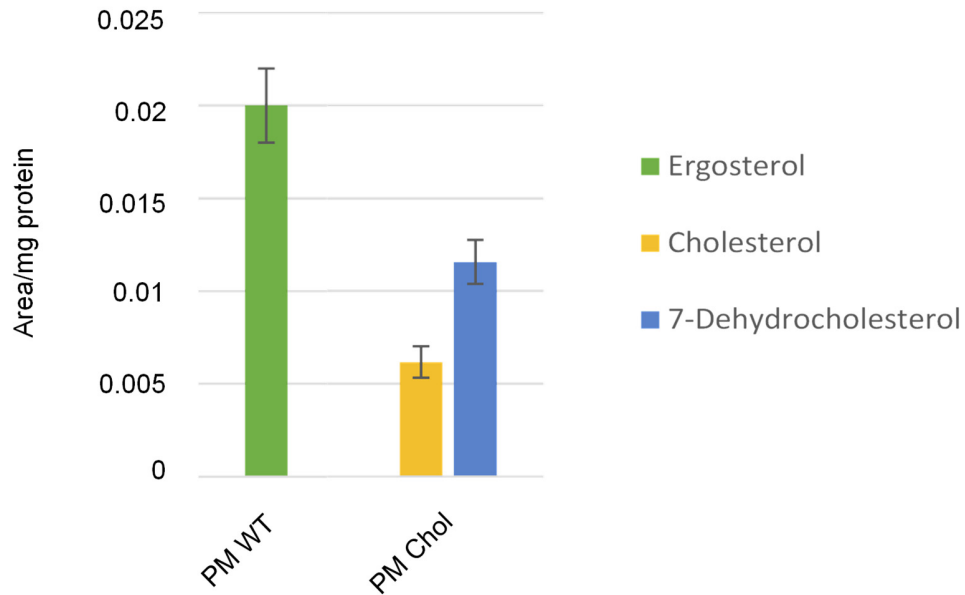

**Figure S3: Sterol analysis of purified plasma membrane fractions of the wild type and cholesterol producing *K. phaffii* strain.** *K. phaffii* wild type and cholesterol strains were cultivated at 28°C for 24 h until they reached early exponential phase and harvested by centrifugation. Plasma membrane (PM) fractions were purified, sterols were extracted and analyzed by GC-MS as described in Materials and Methods. Data are presented as mean from three biological replicates +/- standard deviations.

A

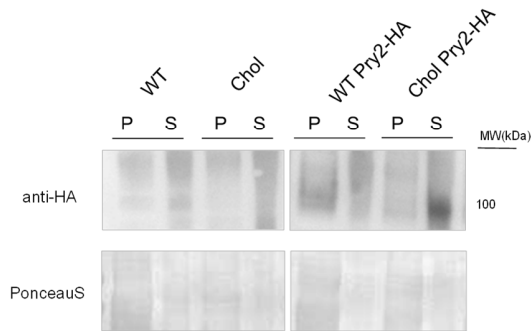

B

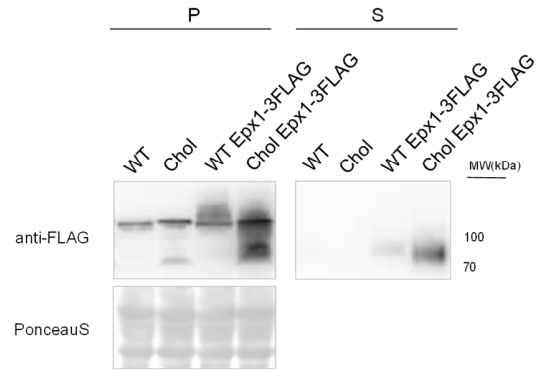

**Figure S4: Pry2-HA and Epx1-3FLAG are overproduced and -secreted in the cholesterol strain. (A)**

A wild type *K. phaffii* strain, the cholesterol producing *K. phaffii* strain (yMH468) and a wild type producing Pry2-HA (yAR021) and a cholesterol strain producing Pry2-HA (yAR023) from its endogenous promoter were cultivated to middle exponential phase at 28°C, harvested, lysed, and proteins were extracted either from the cell pellets (P) or precipitated from the culture supernatant (S), resolved by SDS-PAGE, and analyzed by immunoblotting with anti-HA antiserum, as described under Materials and Methods. Loading control, PonceauS detected on the same immunoblots prior to blocking and incubation with antibody. MW, marker proteins (kDa). (B) A wild type *K. phaffii* strain, the cholesterol producing *K. phaffii* strain (yMH468) and a wild type producing Epx1-FLAG (yAR041) and a cholesterol strain producing Epx1-FLAG (yLB188) from its endogenous promoter were prepared for immunoblot analysis as described under (A) and analyzed with anti-FLAG® M2-Peroxidase (HRP) antibody. MW, marker proteins (kDa).

**Table S1: Strategies and plasmids applied for strain generation**

| CRISPR/Cas9 strategies                        |                                                                           |                                                                                           |                           |
|-----------------------------------------------|---------------------------------------------------------------------------|-------------------------------------------------------------------------------------------|---------------------------|
| Purpose                                       | sgRNA targeting site and PAM sequence (Cas9 plasmid)                      | Preparation of repair cassette                                                            | Yeast strain(s) generated |
| 3HA-tagging of <i>PRY2</i>                    | <u>ATCTACCAGTGGTAACACATTGG</u><br>(pAR003, pPpHyg-Cas9- <i>PRY2-TT</i> )  | Cut of pAR005 (pPpKC2- <i>PRY2</i> -3HA) with <i>SmiI</i> , purification of 2875 DNA band | yAR021, yAR023            |
| 3FLAG-His <sub>6</sub> tagging of <i>EPX1</i> | <u>TTATCAGTGAGTCAGTCATCAGG</u><br>(pAEA464, pPpHyg-Cas9- <i>EPX1-TT</i> ) | <i>EPX1</i> -3FLAG-His <sub>6</sub> repair cassette generated by PCR                      | yAR041, yLB188            |
| Frameshift mutation in <i>UPC2</i>            | <u>GCTCTGATCCAGGGATCTTTAGG</u><br>(pAR015, pPpHyg-Cas9- <i>UPC2</i> )     | -                                                                                         | yAR097                    |
| Frameshift mutation in <i>SNQ2</i>            | <u>CTCTCGCATAATAACAGCTCTGG</u><br>(pFG011, pPpHyg-Cas9- <i>SNQ2</i> )     | -                                                                                         | yAR070                    |
| Frameshift mutation in <i>PDR5</i>            | <u>GAATGGGTCTGATTCCGAATTGG</u><br>(pAR007, pPpHyg-Cas9- <i>PDR5</i> )     | -                                                                                         | yAR104, yAR105            |
| Frameshift mutation in <i>PDR12</i>           | <u>TATGAGCCCACTAGATTTGTAGG</u><br>(pFG013, pPpHyg-Cas9- <i>PDR12</i> )    | -                                                                                         | yAR077                    |
| Frameshift mutation in <i>PDR15</i>           | <u>GCAGTGAAGAAGCCATTCAAAGG</u><br>(pAR012, pPpHyg-Cas9- <i>PDR15</i> )    | -                                                                                         | yAR093                    |

**Table S2: Yeast strains used in this study**

| Strain               | Genotype                                                                                                                                            | Reference or source              |
|----------------------|-----------------------------------------------------------------------------------------------------------------------------------------------------|----------------------------------|
| <i>S. cerevisiae</i> |                                                                                                                                                     |                                  |
| RH2881               | <i>MATa ura3Δ leu2Δ his3Δ trp1Δ can1Δ bar1Δ</i>                                                                                                     | Howard Riezman strain collection |
| RH6829               | <i>MATa ura3Δ leu2Δ his3Δ trp1Δ can1Δ bar1Δ erg5::HIS3-TDH3<sub>prom</sub>-DrDHCR24 erg6::TRP1-TDH3<sub>prom</sub>-DrDHCR7</i>                      | [3]                              |
| <i>K. phaffii</i>    |                                                                                                                                                     |                                  |
| CBS7435 <sup>a</sup> | <i>his4Δ</i>                                                                                                                                        | [4]                              |
| yMH468               | CBS7435 <i>his4Δ erg5::GAP<sub>prom</sub>-DrDHCR7-Zeo<sup>R</sup> erg6::GAP<sub>prom</sub>-DrDHCR24-G418<sup>R</sup></i>                            | [5]                              |
| yAR021               | CBS7435 <i>his4Δ PRY2-3HA</i>                                                                                                                       | This study                       |
| yAR023               | CBS7435 <i>his4Δ erg5::GAP<sub>prom</sub>-DrDHCR7-Zeo<sup>R</sup> erg6::GAP<sub>prom</sub>-DrDHCR24-G418<sup>R</sup> PRY2-3HA</i>                   | This study                       |
| yAR041               | CBS7435 <i>his4Δ EPX1- His<sub>6</sub>-3FLAG</i>                                                                                                    | This study                       |
| yLB188               | CBS7435 <i>his4Δ erg5::GAP<sub>prom</sub>-DrDHCR7-Zeo<sup>R</sup> erg6::GAP<sub>prom</sub>-DrDHCR24-G418<sup>R</sup> EPX- His<sub>6</sub>-3FLAG</i> | This study                       |
| yAR070               | CBS7435 <i>his4Δ snq2-1</i>                                                                                                                         | This study                       |
| yAR056               | CBS7435 <i>his4Δ pdr5-1</i>                                                                                                                         | This study                       |
| yAR077               | CBS7435 <i>his4Δ pdr12-1</i>                                                                                                                        | This study                       |
| yAR093               | CBS7435 <i>his4Δ pdr15-1</i>                                                                                                                        | This study                       |
| yAR097               | CBS7435 <i>his4Δ erg5::GAP<sub>prom</sub>-DrDHCR7-Zeo<sup>R</sup> erg6::GAP<sub>prom</sub>-DrDHCR24-G418<sup>R</sup> upc2-1</i>                     | This study                       |
| yAR074               | CBS7435 <i>his4Δ erg5::GAP<sub>prom</sub>-DrDHCR7-Zeo<sup>R</sup> erg6::GAP<sub>prom</sub>-DrDHCR24-G418<sup>R</sup> snq2-1</i>                     | This study                       |
| yAR053               | CBS7435 <i>his4Δ erg5::GAP<sub>prom</sub>-DrDHCR7-Zeo<sup>R</sup> erg6::GAP<sub>prom</sub>-DrDHCR24-G418<sup>R</sup> pdr5-1</i>                     | This study                       |
| yAR080               | CBS7435 <i>his4Δ erg5::GAP<sub>prom</sub>-DrDHCR7-Zeo<sup>R</sup> erg6::GAP<sub>prom</sub>-DrDHCR24-G418<sup>R</sup> pdr12-1</i>                    | This study                       |
| yAR092               | CBS7435 <i>his4Δ erg5::GAP<sub>prom</sub>-DrDHCR7-Zeo<sup>R</sup> erg6::GAP<sub>prom</sub>-DrDHCR24-G418<sup>R</sup> pdr15-1</i>                    | This study                       |

<sup>a</sup> NRRL Y-11430, ATCC 76273.

## Supplementary References

1. Schindelin, J.; Arganda-Carrera, I.; Frise, E.; Verena, K.; Mark, L.; Tobias, P.; Stephan, P.; Curtis, R.; Stephan, S.; Benjamin, S.; et al. Fiji - an Open Platform for Biological Image Analysis. *Nat. Methods* **2009**, *9*, doi:10.1038/nmeth.2019.Fiji.
2. Guan, X.L.; Riezman, I.; Wenk, M.R.; Riezman, H. Yeast Lipid Analysis and Quantification by Mass Spectrometry. *Methods Enzymol.* **2010**, *470*, 369–391, doi:10.1016/S0076-6879(10)70015-X.
3. Souza, C.M.; Schwabe, T.M.E.; Pichler, H.; Ploier, B.; Leitner, E.; Guan, X.L.; Wenk, M.R.; Riezman, I.; Riezman, H. A Stable Yeast Strain Efficiently Producing Cholesterol Instead of Ergosterol Is Functional for Tryptophan Uptake, but Not Weak Organic Acid Resistance. *Metab. Eng.* **2011**, *13*, 555–569, doi:10.1016/j.ymben.2011.06.006.
4. Näätäsaari, L.; Mistlberger, B.; Ruth, C.; Hajek, T.; Hartner, F.S.; Glieder, A. Deletion of the *Pichia Pastoris* *KU70* Homologue Facilitates Platform Strain Generation for Gene Expression and Synthetic Biology. *PLoS One* **2012**, *7*, e39720, doi:10.1371/journal.pone.0039720.
5. Bernauer, L.; Berzak, P.; Lehmayr, L.; Messenlehner, J.; Oberdorfer, G.; Zellnig, G.; Wolinski, H.; Augustin, C.; Baeck, M.; Emmerstorfer-Augustin, A. Sterol Interactions Influence the Function of Wsc Sensors. *J. Lipid Res.* **2023**, *64*, 100466, doi:10.1016/j.jlr.2023.100466.
